# Supplementary material for: The Human Tyrosyl-DNA Phosphodiesterase 1 (hTdp1) Inhibitor NSC120686 as an Exploratory Tool to Investigate Plant Tdp1 Genes
Source: Genes (Basel). 2018 Mar 28;9(4):186. doi: 10.3390/genes9040186 (PMC5924528; doi:10.3390/genes9040186)
Supplement: Supplementary file 1 [file genes-09-00186-s001.xlsx]

## Sheet: Table S1
Table S1. Results of BLAST search performed in the Phytozome v12.1.5 database using the accessions of human Tdp1 putative interactors.
hTdp1 interactors	M. truncatula Accessions	Description / Function	Score	E-value
XRCC6	Medtr1g116980.1	ATP-dependent DNA helicase 2 subunit Ku70	182.6	5.6e-49
XRCC5	Medtr4g023560.1	ATP-dependent DNA helicase 2 subunit Ku80	182.6	2e-48
PRKDC	Medtr5g005380.1	Serine/Threonine-kinase TOR	159.8	4.3e-38
	Medtr4g068580.1	phosphatidylinositol 3- and 4-kinase	126.3	5.6e-28
	Medtr1g113830.1	Serine/Threonine-kinase ATR-like protein	126.3	6.5e-28
	Medtr3g077860.1	ataxia telangiectasia mutated protein, putative	113.6	4e-24
	Medtr5g022000.1	transformation/transcription domain associated protein	72.8	9.9e-12
	Medtr5g034120.1	phosphatidylinositol 3-kinase	41.6	0.019
Top1	Medtr1g040355.1	DNA topoisomerase type I	485	2.4e-157
	Medtr0172s0010.1	DNA topoisomerase type I	466.1	4.6e-150
	Medtr3g114350.1	DNA topoisomerase type I	421.4	1.9e-133
	Medtr3g114150.1	DNA topoisomerase I	367.1	2.9e-114
	Medtr3g114260.1	DNA topoisomerase type I	346.3	5.6e-106
	Medtr3g114360.1	eukaryotic DNA topoisomerase I, catalytic core protein	38.1	0.025
DCLRE1C	Medtr0280s0030.1	DNA repair metallo-beta-lactamase family protein	109.8	8.9e-25
	Medtr7g084670.1	DNA cross-link repair protein	107.5	4.4e-24
	Medtr7g084670.2	DNA cross-link repair protein	104	5.2e-23
	Medtr1g052840.1	DNA repair metallo-beta-lactamase family protein	100.1	5.9e-22
	Medtr3g105470.1	DNA cross-link repair protein pso2/SNM1, putative	94	1.2e-19
	Medtr3g096240.1	DNA repair metallo-beta-lactamase family protein	82.8	3.2e-16
	Medtr7g082860.2	ATP-dependent DNA ligase	83.2	5e-16
	Medtr7g082860.5	ATP-dependent DNA ligase	82.8	5.6e-16
	Medtr7g082860.1	ATP-dependent DNA ligase	83.2	5.7e-16
	Medtr7g082860.4	ATP-dependent DNA ligase	82.8	6.9e-16
	Medtr7g082860.3	ATP-dependent DNA ligase	82.4	7.6e-16
LIG3	Medtr8g468400.1	DNA ligase I, ATP-dependent protein	168.3	8e-43
	Medtr4g057345.1	DNA ligase I, ATP-dependent protein	162.2	1.3e-40
	Medtr4g057340.1	DNA ligase I, ATP-dependent protein	155.2	1.5e-38
	Medtr2g038030.2	DNA ligase	155.6	1.7e-38
	Medtr2g038030.1	DNA ligase	155.6	2.5e-38
	Medtr7g082860.1	ATP-dependent DNA ligase	146.7	2.9e-35
	Medtr7g082860.2	ATP-dependent DNA ligase	123.3	4.4e-28
	Medtr7g082860.3	ATP-dependent DNA ligase	123.3	4.5e-28
	Medtr7g082860.4	ATP-dependent DNA ligase	100.9	3.9e-21
	Medtr7g082860.5	ATP-dependent DNA ligase	57.4	7.5e-08
	Medtr6g052000.1	poly [ADP-ribose] polymerase	39.7	0.0023
	Medtr6g466500.2	polynucleotide phosphatase/kinase	39.7	0.013
	Medtr6g466500.1	polynucleotide phosphatase/kinase	39.7	0.013
MRE11A	Medtr2g081100.2	double-strand break repair protein Mre11	409.1	3.1e-131
	Medtr2g081100.1	double-strand break repair protein Mre11	407.5	2.9e-130
APEX1	Medtr1g051380.1	apurinic endonuclease-redox protein	248.1	5.3e-77
	Medtr1g051380.2	apurinic endonuclease-redox protein	248.1	1.4e-76
	Medtr3g075220.1	DNA-(apurinic or apyrimidinic site) lyase-like protein	117.5	1.9e-29
	Medtr3g075220.2	DNA-(apurinic or apyrimidinic site) lyase-like protein	85.1	8.1e-19
	Medtr8g075810.2	apurinic/apyrimidinic endonuclease	75.9	6e-15
	Medtr8g075810.1	apurinic/apyrimidinic endonuclease	75.9	6e-15
	Medtr3g022950.1	endonuclease/exonuclease/phosphatase family protein	36.6	0.031
	Medtr1g061220.1	endonuclease/exonuclease/phosphatase family protein	36.6	0.036
	Medtr6g016175.1	endonuclease/exonuclease/phosphatase family protein	36.2	0.046
	Medtr1g068728.1	hypothetical protein	34.7	0.093
POLB	Medtr7g039450.1	DNA polymerase lambda-like protein	189.9	1.2e-54
	Medtr5g040170.1	DNA polymerase lambda-like protein	187.6	1e-53

## Sheet: Table S2
Table S2. Results of BLAST search performed in the Phytozome v12.1.5 database using the accessions of Arabidopsis Tdp1α putative interactors.
AtTdp1α interactors	M. truncatula Accessions	Description / Function	Score	E-value
MRE11	Medtr2g081100.2	double-strand break repair protein Mre11	982.6	0
	Medtr2g081100.1	double-strand break repair protein Mre11	980.7	0
DNAseI-like	Medtr3g075220.1	DNA-(apurinic or apyrimidinic site) lyase-like protein	542	0
	Medtr3g075220.2	DNA-(apurinic or apyrimidinic site) lyase-like protein	401.4	5.2e-139
	Medtr1g051380.1	apurinic endonuclease-redox protein	104.8	2.1e-24
	Medtr1g051380.2	apurinic endonuclease-redox protein	104.8	2.1e-24
	Medtr3g009190.3	rossmann-fold NAD(P)-binding domain protein	35	0.097
Endonuclease 2	Medtr8g075810.2	apurinic/apyrimidinic endonuclease	347.1	1.3e-112
	Medtr8g075810.1	apurinic/apyrimidinic endonuclease	347.1	1.3e-112
	Medtr1g051380.1	apurinic endonuclease-redox protein	38.9	0.0085
	Medtr1g051380.2	apurinic endonuclease-redox protein	38.9	0.0085
CaLB	Medtr7g075790.1	C2 calcium/lipid-binding and GRAM domain protein	362.1	3.9e-118
	Medtr8g035590.1	calcium-dependent lipid-binding (CaLB domain) family protein	359	6.3e-117
	Medtr4g115660.1	calcium-dependent lipid-binding (CaLB domain) family protein	149.1	1.7e-38
	Medtr3g106660.1	calcium-dependent lipid-binding (CaLB domain) family protein	142.9	1.7e-36
AT3G60950	Medtr8g035590.1	calcium-dependent lipid-binding (CaLB domain) family protein	359.4	1.2e-115
	Medtr7g075790.1	C2 calcium/lipid-binding and GRAM domain protein	358.2	3.7e-115
	Medtr3g106660.1	calcium-dependent lipid-binding (CaLB domain) family protein	146.7	2.9e-37
	Medtr4g115660.1	calcium-dependent lipid-binding (CaLB domain) family protein	145.6	8.4e-37
ARP	Medtr1g051380.2	apurinic endonuclease-redox protein	562.4	0
	Medtr1g051380.1	apurinic endonuclease-redox protein	561.2	0
	Medtr3g075220.1	DNA-(apurinic or apyrimidinic site) lyase-like protein	116.7	2.5e-28
	Medtr8g075810.2	apurinic/apyrimidinic endonuclease	94.4	5.4e-20
	Medtr8g075810.1	apurinic/apyrimidinic endonuclease	94.4	5.4e-20
	Medtr3g075220.2	DNA-(apurinic or apyrimidinic site) lyase-like protein	86.7	1.7e-18
Top1α	Medtr1g040355.1	DNA topoisomerase type I	827	0
	Medtr0172s0010.1	DNA topoisomerase type I	840	0
	Medtr3g114350.1	DNA topoisomerase type I	755.4	0
	Medtr3g114150.1	DNA topoisomerase I	627.1	0
	Medtr3g114260.1	DNA topoisomerase type I	672.5	0
	Medtr3g114360.1	eukaryotic DNA topoisomerase I, catalytic core protein	95.5	6.4e-21
Top1β	Medtr0172s0010.1	DNA topoisomerase type I	885.9	0
	Medtr3g114350.1	DNA topoisomerase type I	863.2	0
	Medtr3g114150.1	DNA topoisomerase I	677.2	0
	Medtr3g114260.1	DNA topoisomerase type I	728.4	0
	Medtr3g114360.1	eukaryotic DNA topoisomerase I, catalytic core protein	102.8	2.5e-23
APTX	Medtr1g024820.1	transcription factor bHLH140-like protein	820.8	0
	Medtr1g024155.1	transcription factor bHLH140-like protein	106.3	5.7e-26
	Medtr8g092520.1	transcription factor bHLH140-like protein, putative	93.6	4.6e-22
	Medtr1g007640.1	appr-1-P processing enzyme family protein	45.8	5.5e-05

## Sheet: Table S3
Table S3. Raw data of qRT-PCR relative expression used for PCA analysis. Data is presented in triplicate normalized to reference gene (ELF1α) and shown as prior to reporting to DMSO CTRL.
	Tdp1α	Tdp1β	Tdp2α	Top2	Top1β	ENDO3	XPF	MRE11	Rad50	ERCC1	MUS81	PARP1	Rad51-like	DRT100	CDLRP1A
NT_1	0.00170915	0.00547726	0.00691654	0.00477522	0.0383442	0.000481964	0.00358641	0.0136251	0.0288577	0.00320239	0.00509199	0.00539035	0.00460784	0.019281	0.003878
NT_2	0.000715642	0.0045977	0.00732634	0.0031968	0.0454248	0.000214429	0.00425574	0.0128294	0.0402806	0.00453506	0.00453506	0.00763799	0.00366013	0.0136166	0.00488017
NT_3	0.000956522	0.00503748	0.00691654	0.00254745	0.0509804	0.000348196	0.00712288	0.0172054	0.0333667	0.00189955	0.00680259	0.00962705	0.00346405	0.0153595	0.00434641
DMSO CTRL_1	0.00331579	0.0159649	0.0150292	0.00595186	0.0551402	0.000456349	0.00421882	0.0205164	0.0301587	0.0025446	0.00643192	0.00643192	0.00560748	0.0221495	0.00630841
DMSO CTRL_2	0.00295322	0.0169006	0.0126316	0.0125164	0.0440187	0.000312698	0.00595186	0.0162911	0.0331746	0.00360563	0.00765258	0.00643192	0.00593458	0.0209346	0.00446262
DMSO CTRL_3	0.0031345	0.0133918	0.0133918	0.00335667	0.0658879	0.000384524	0.00595186	0.0129108	0.0382937	0.00285915	0.0102347	0.00967136	0.0035514	0.0186449	0.00398131
NSC 75_1	0.00123944	0.0119298	0.01277	0.00412838	0.0601515	0.000486158	0.0072973	0.0125385	0.0372316	0.00207692	0.0105385	0.00938462	0.00408333	0.0240909	0.00575758
NSC 75_2	0.00385816	0.0256338	0.0075493	0.00436486	0.0568182	0.000621469	0.00689189	0.0149231	0.0322599	0.00277692	0.00526154	0.00992308	0.00432576	0.0302273	0.00575758
NSC 75_3	0.0025488	0.0287324	0.00343262	0.00436486	0.0506818	0.000350847	0.00412838	0.0105385	0.0409605	0.00371538	0.00792308	0.0105385	0.00810606	0.0191667	0.00484848
NSC 150_1	0.00485106	0.00774468	0.00578723	0.00632867	0.0622222	0.000224302	0.00674126	0.0121725	0.0561576	0.00361526	0.0121725	0.00812604	0.00376296	0.00995556	0.0053037
NSC 150_2	0.00385816	0.00729078	0.00485106	0.00713287	0.0737778	0.000271264	0.00674126	0.0129022	0.0463054	0.00254726	0.00643449	0.00643449	0.00299259	0.0125333	0.00474074
NSC 150_3	0.00689362	0.00751773	0.0138942	0.00828671	0.0622222	0.000247783	0.00534266	0.013665	0.044335	0.00269652	0.00930348	0.00912106	0.004	0.0118222	0.00355556
NSC 300_1	0.00519231	0.0116827	0.00485577	0.00549521	0.0330205	0.000405607	0.0051885	0.023653	0.0451713	0.00524201	0.00661187	0.00787215	0.00499707	0.0131965	0.00375367
NSC 300_2	0.00364904	0.0103846	0.00460096	0.00246645	0.0465689	0.000467913	0.00549521	0.013242	0.0410592	0.00416438	0.0117808	0.0070137	0.00316129	0.0117889	0.00420528
NSC 300_3	0.00485577	0.0123558	0.00460096	0.0086901	0.0656891	0.00043676	0.00534185	0.0210959	0.0355763	0.00441096	0.00742466	0.00940639	0.00407918	0.0124927	0.00237537
